# Supplementary material
Source: PubMed Central journal article supplement (PMC8134763)
Supplement: NIHMS1669157-supplement-3.pdf [file NIHMS1669157-supplement-3.pdf]

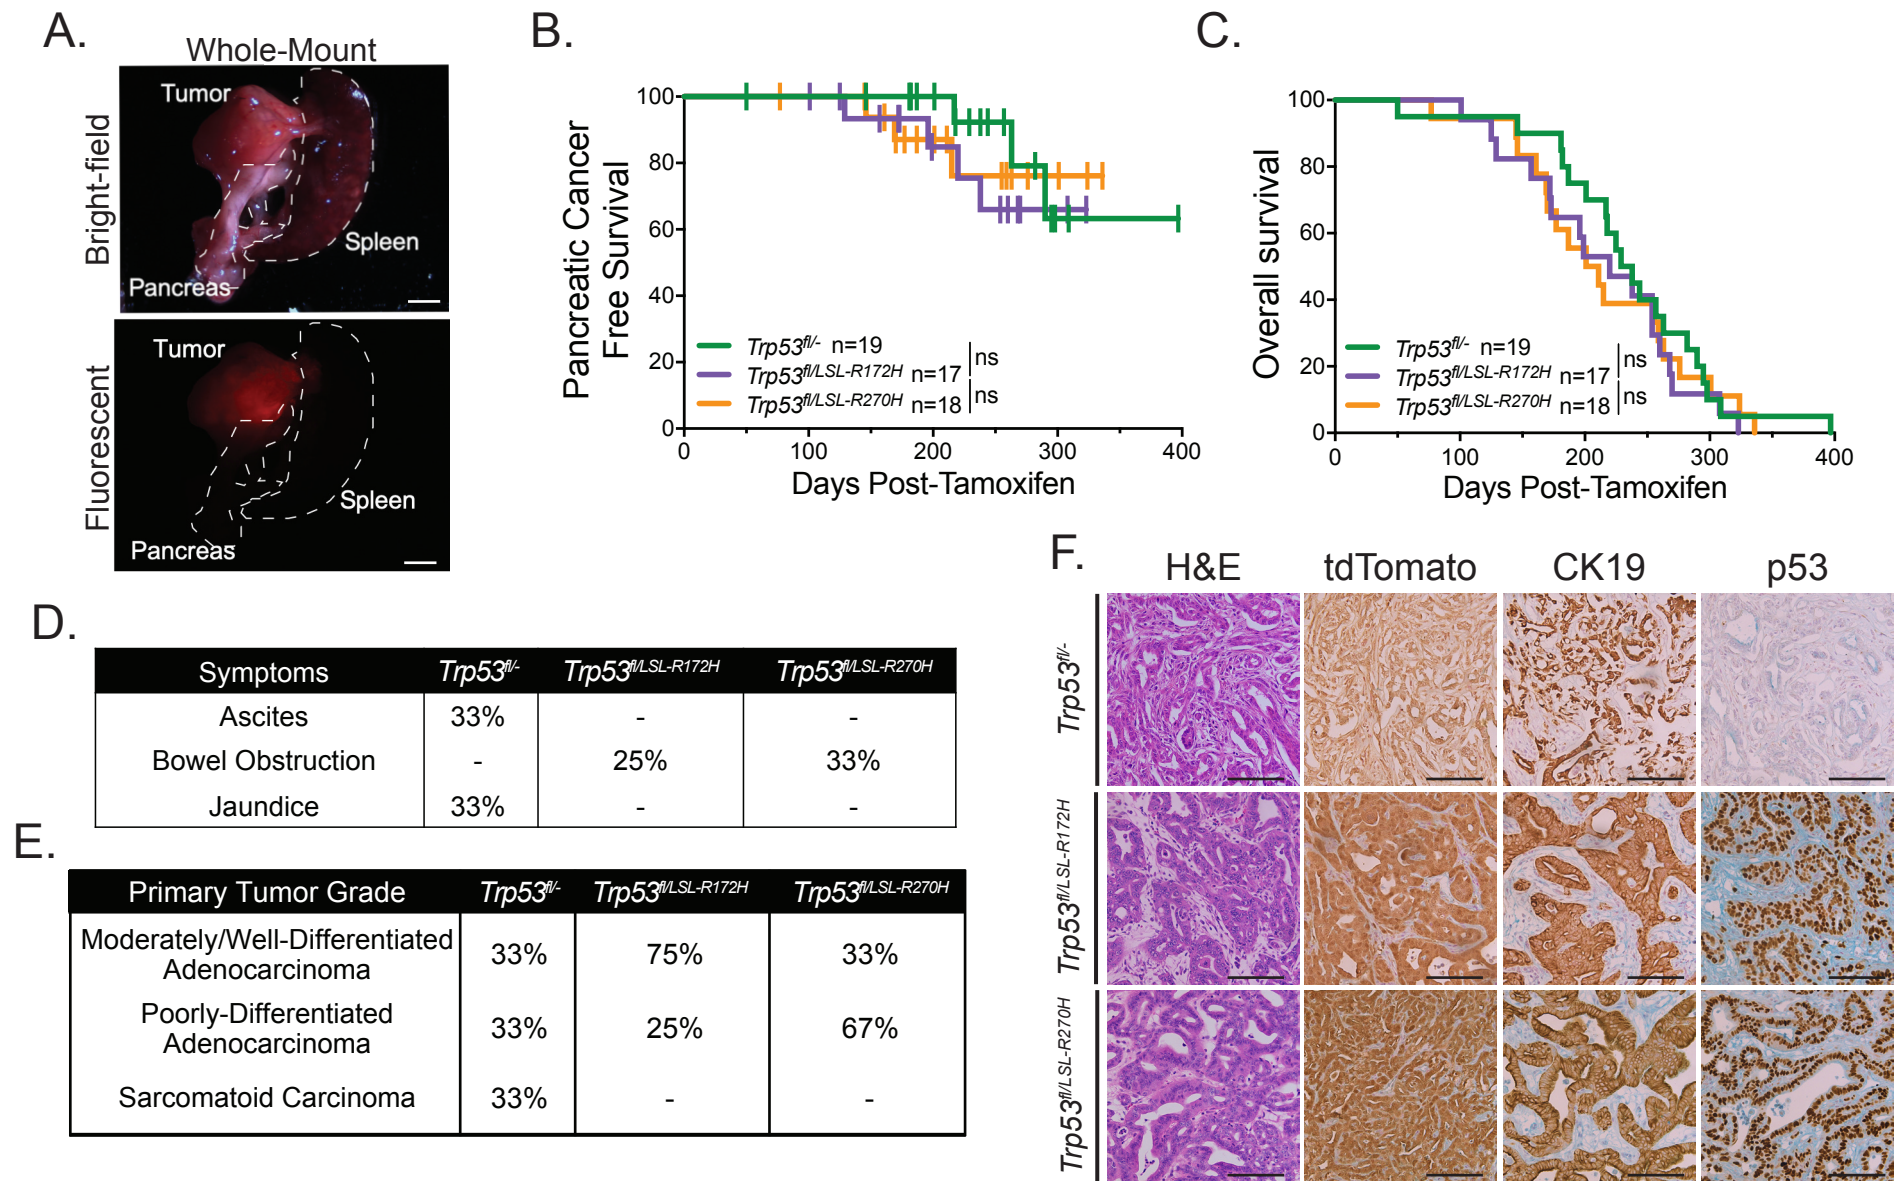

**Supplementary Figure 3: Analysis of pancreatic cancer development from adult mouse ductal cells**

**(A)** Representative bright-field and fluorescence dissecting scope images of a primary pancreatic tumor in a *KT;Sox9CreER;Trp53<sup>fl/fl</sup>* mouse. Scale Bar = 2 cm. **(B)** Kaplan-Meier analysis of pancreatic cancer-free survival of *KT;Sox9CreER;Trp53<sup>fl/x</sup>* (where x represents different *Trp53* alleles) cohorts. Labels indicate the *Trp53* status of each cohort. Pancreatic cancer free survival in *KT;Sox9CreER;Trp53<sup>fl/LSL-R172H</sup>* mice (n = 17) and *KT;Sox9CreER;Trp53<sup>fl/LSL-R270H</sup>* mice (n = 18) is similar to *KT;Sox9CreER;Trp53<sup>fl/-</sup>* mice (n = 19), using the log-rank test. Not significant = ns. **(C)** Kaplan-Meier analysis of overall survival of *KT;Sox9CreER;Trp53<sup>fl/x</sup>* (where x represents different *Trp53* alleles) cohorts. Labels indicate the *Trp53* status of each cohort. Pancreatic cancer free survival in *KT;Sox9CreER;Trp53<sup>fl/LSL-R172H</sup>* mice (n = 17) and *KT;Sox9CreER;Trp53<sup>fl/LSL-R270H</sup>* mice (n = 18) is similar to *KT;Sox9CreER;Trp53<sup>fl/-</sup>* mice (n = 19), based on the log-rank test. Not significant = ns. **(D)** Table summarizing the percentages of pancreatic tumor-bearing *KT;Sox9CreER;Trp53<sup>fl/-</sup>* (n = 3), *KT;Sox9CreER;Trp53<sup>fl/LSL-R172H</sup>* (n = 4), and *KT;Sox9CreER;Trp53<sup>fl/LSL-R270H</sup>* (n = 3) mice presenting with clinical symptoms of pancreatic cancer (ascites, bowel obstruction, and jaundice) at morbidity. **(E)** Table summarizing the percentages of pancreatic tumor-bearing *KT;Sox9CreER;Trp53<sup>fl/-</sup>* (n = 3), *KT;Sox9CreER;Trp53<sup>fl/LSL-R172H</sup>* (n = 4), and *KT;Sox9CreER;Trp53<sup>fl/LSL-R270H</sup>* (n = 3) mice with the primary pancreatic tumor grade (comprising >50% of the tumor) called as moderately/well-differentiated adenocarcinoma, poorly-differentiated adenocarcinoma, or sarcomatoid carcinoma. **(F)** Representative histological images of the pancreatic ductal adenocarcinomas found in each cohort analyzed by H&E staining and immunohistochemistry of tdTomato, CK19, and p53. Scale Bar = 100 μm.
