# Supplementary material
Source: PubMed Central journal article supplement (PMC8134763)
Supplement: NIHMS1669157-supplement-4.pdf [file NIHMS1669157-supplement-4.pdf]

A.

| Cell-of-Origin | Genotype                                              | Days Post-Tamoxifen | Primary Tumor Grade Differentiation |
|----------------|-------------------------------------------------------|---------------------|-------------------------------------|
| Acinar         | <i>KT;Ptf1a<sup>CreER</sup>;Trp53<sup>fl/fl</sup></i> | 119                 | Moderate/Well                       |
|                | <i>KT;Ptf1a<sup>CreER</sup>;Trp53<sup>fl/fl</sup></i> | 120                 | Moderate/Well                       |
|                | <i>KT;Ptf1a<sup>CreER</sup>;Trp53<sup>fl/fl</sup></i> | 128                 | Moderate/Well                       |
|                | <i>KT;Ptf1a<sup>CreER</sup>;Trp53<sup>fl/fl</sup></i> | 134                 | Poor                                |
| Ductal         | <i>KT;Sox9CreER;Trp53<sup>fl/fl</sup></i>             | 195                 | Poor                                |
|                | <i>KT;Sox9CreER;Trp53<sup>fl/fl</sup></i>             | 215                 | Moderate/Well                       |
|                | <i>KT;Sox9CreER;Trp53<sup>fl/fl</sup></i>             | 218                 | Moderate/Well                       |

B.

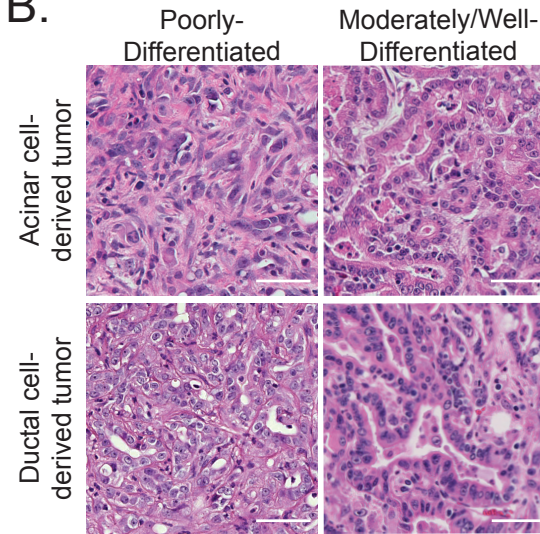

C.

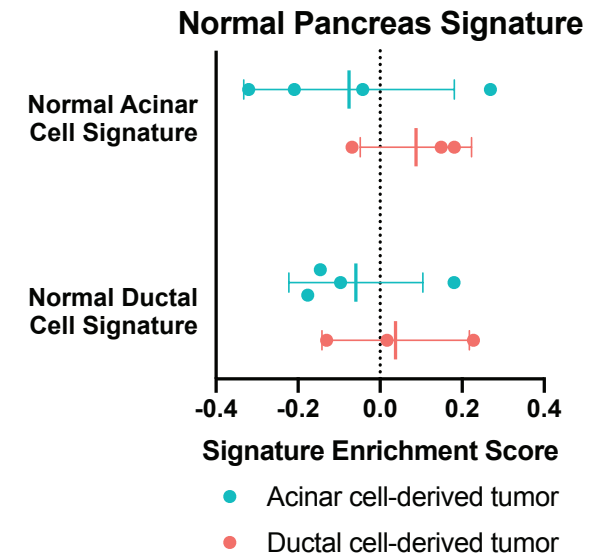

#### Supplementary Figure 4: Transcriptome and histological analysis of mouse acinar and ductal cell-derived tumors

(A) Table summary of the tumors analyzed by RNA-Seq. Days Post-Tamoxifen refers to the time after the first day of mouse tamoxifen treatment, when mice succumbed to pancreatic tumors. Primary tumor grade (comprising >50% of the tumor) was called as moderately/well-differentiated adenocarcinoma or poorly-differentiated adenocarcinoma. (B) Representative H&E images of acinar cell-derived and ductal cell-derived tumors used for RNA-Seq classified as poorly and moderately/well-differentiated adenocarcinomas (C) Comparison of normal pancreatic acinar and ductal cell signature (38) enrichment scores in acinar and ductal cell-derived tumors based on a two-tailed Student's t-test (Not Significant).
